# Supplementary material for: Assessment of the Effects of COVID-19 Pandemic Stay-at-Home Measures on Potable Water Consumption Patterns, Location, and Financial Impacts for Water Utilities in Colombian Cities
Source: MDPI journal article supplement (doi:10.3390/w14193004), 2022-09-24
Supplement: s1 [file s1]

Archive with 1 entries (1 files):
- water-1936121-supplementary.pdf
